# Supplementary material for: A bio-inspired synthetic route to the core ring systems of Spiraea atisine-type diterpenoid alkaloids and related diterpenes
Source: Royal Society of Chemistry journal article supplement (doi:10.1039/c6ob00053c), 2016-01-01

Electronic Supplementary Information For:

## **Bio-inspired Synthetic Route to the Core Ring Systems of atisine-Type**

### **Spiraea Diterpenoid Alkaloids and Related Diterpenes**

Dai-Hui Tang,<sup>a†</sup> Ding Ma,<sup>a†</sup> Hang Cheng,<sup>a</sup> Yong-Li Li,<sup>a</sup> Liang Xu<sup>\*a,b</sup>

**Copies of <sup>1</sup>H NMR and <sup>13</sup>C NMR spectra of all new compounds.....S2**

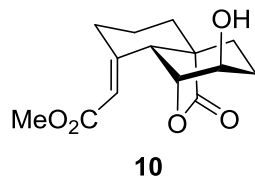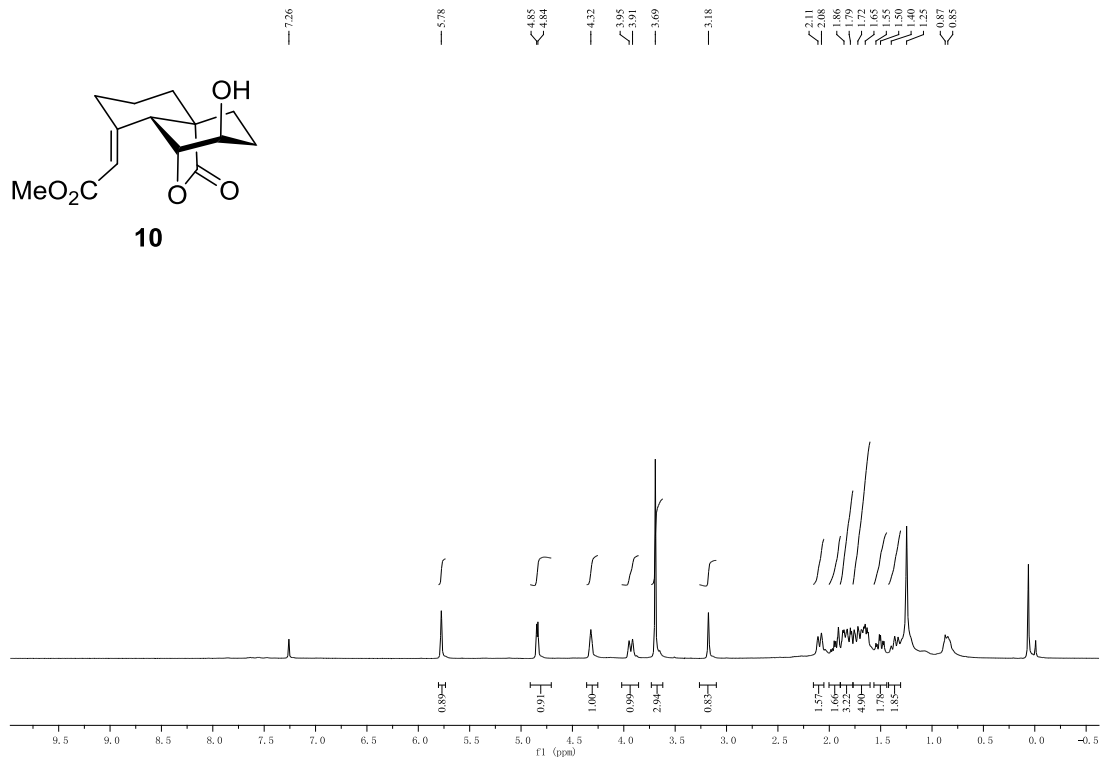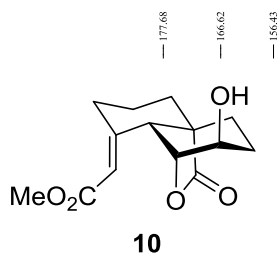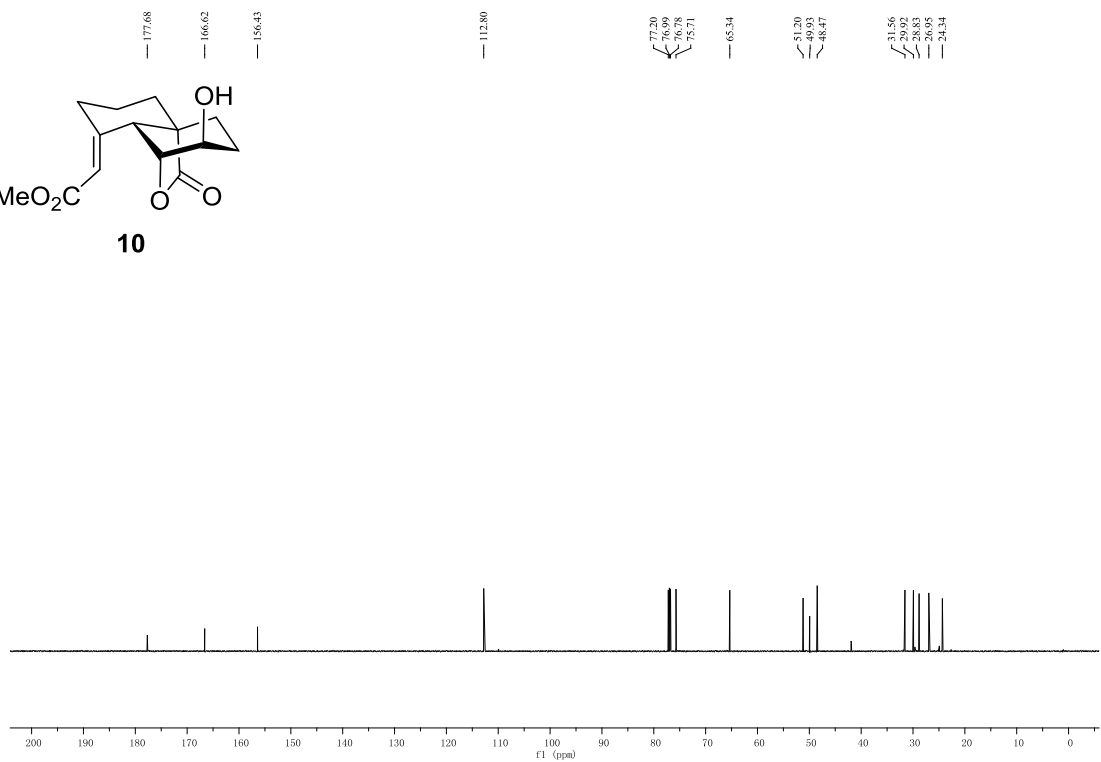

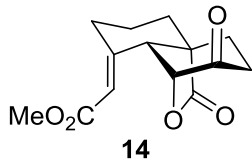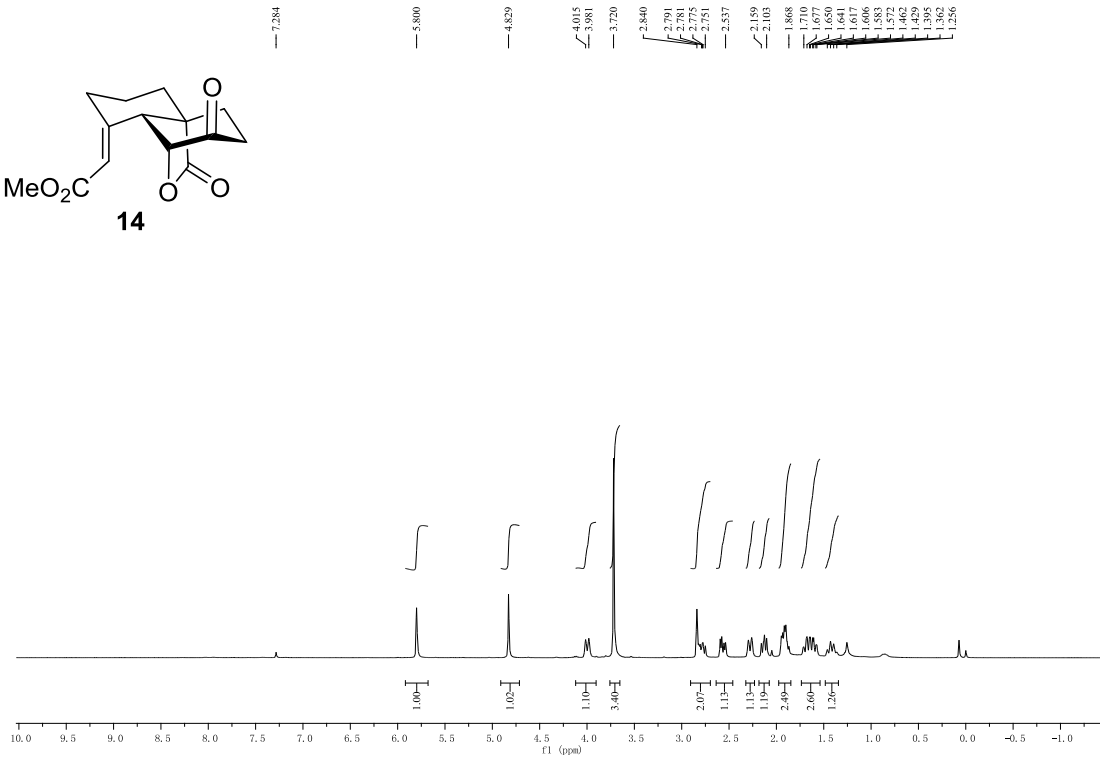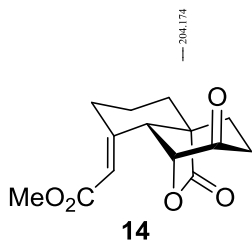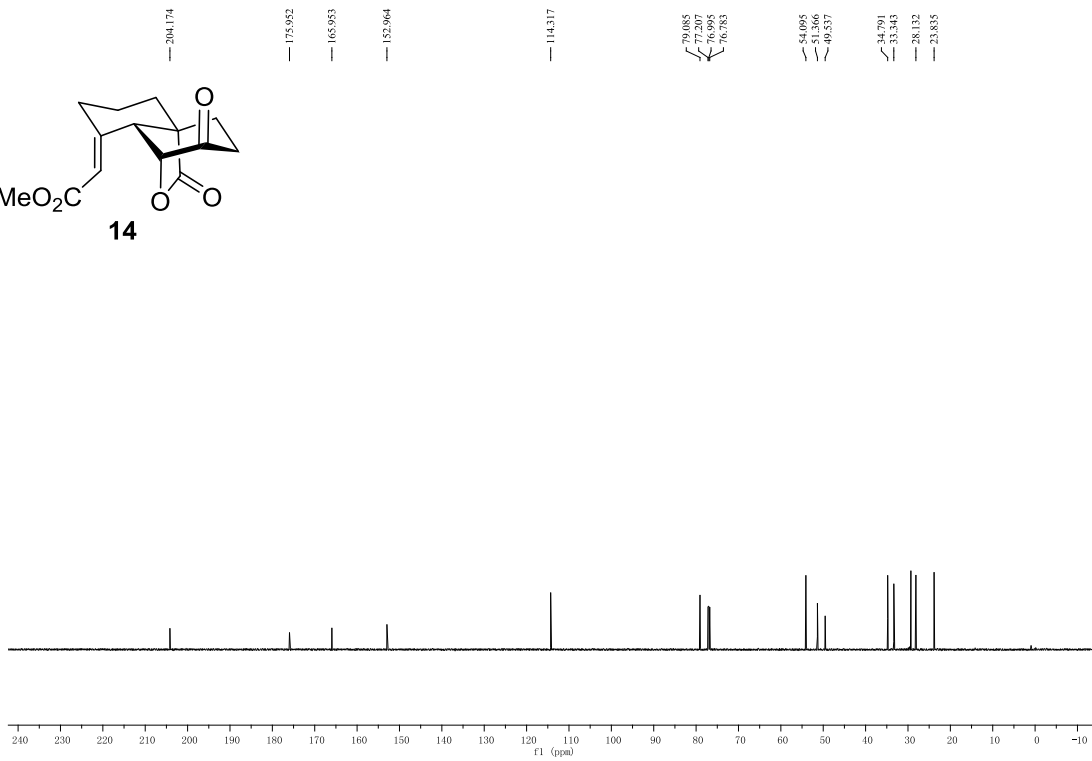

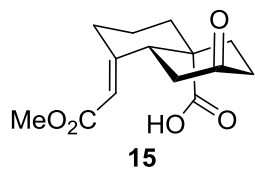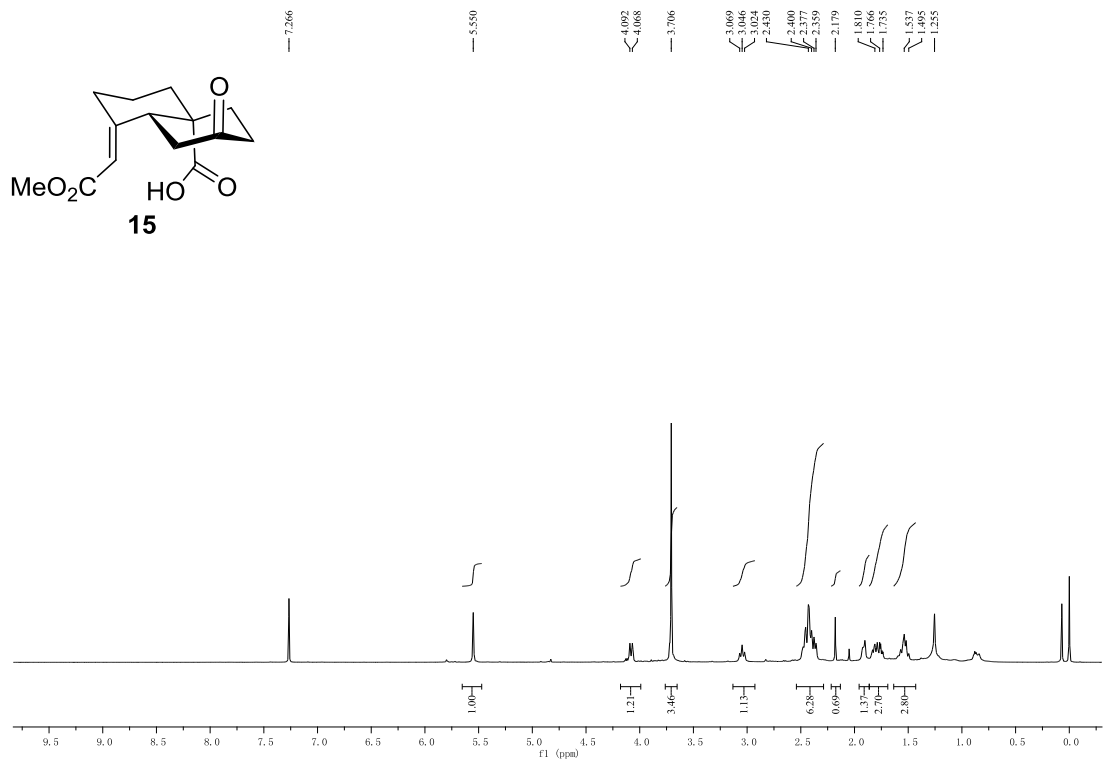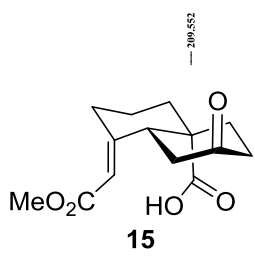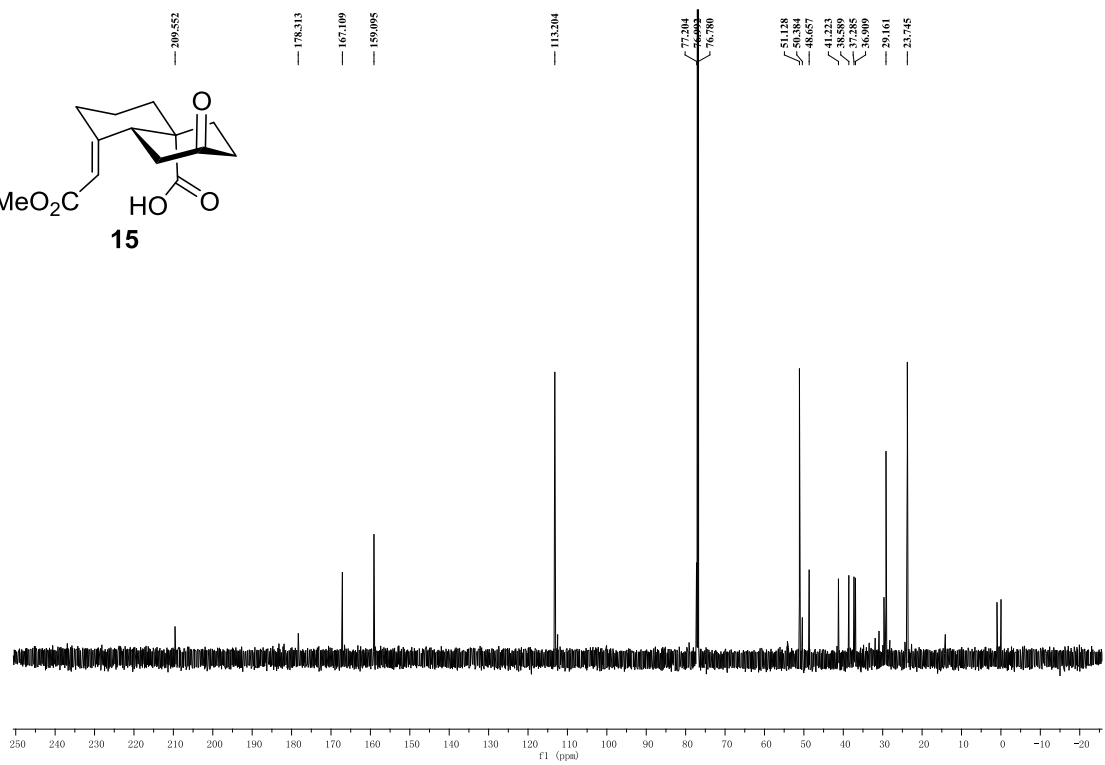

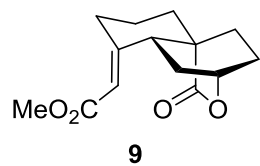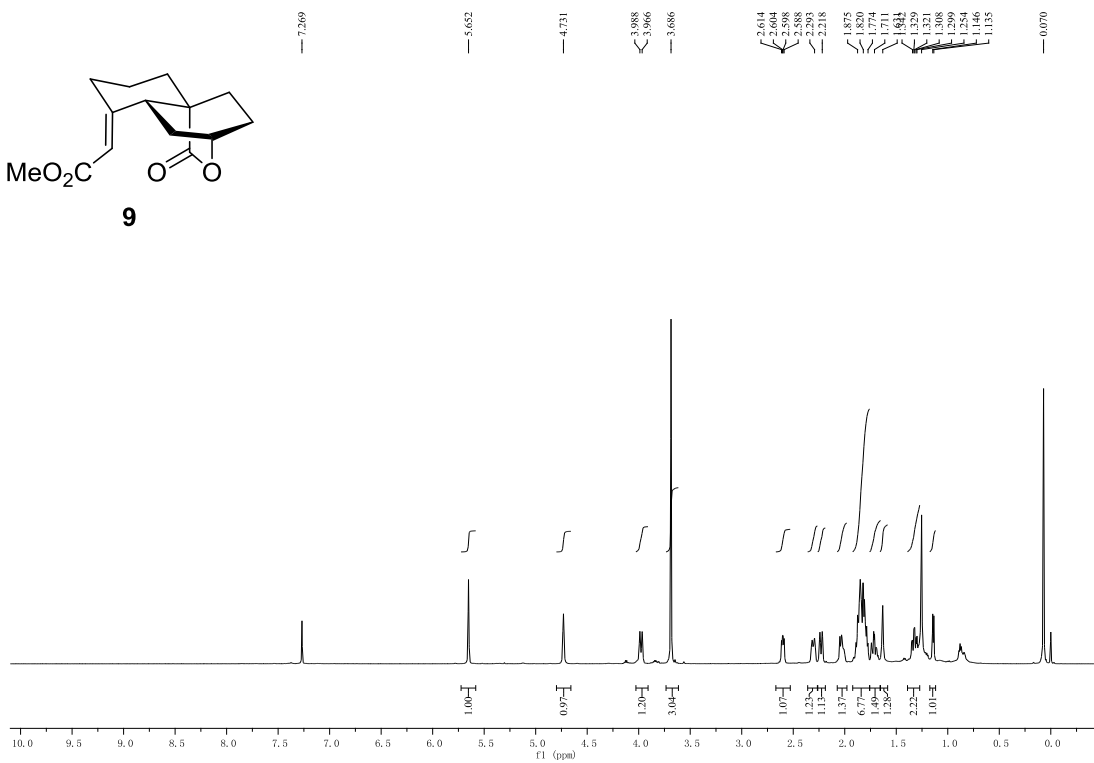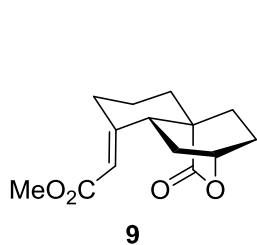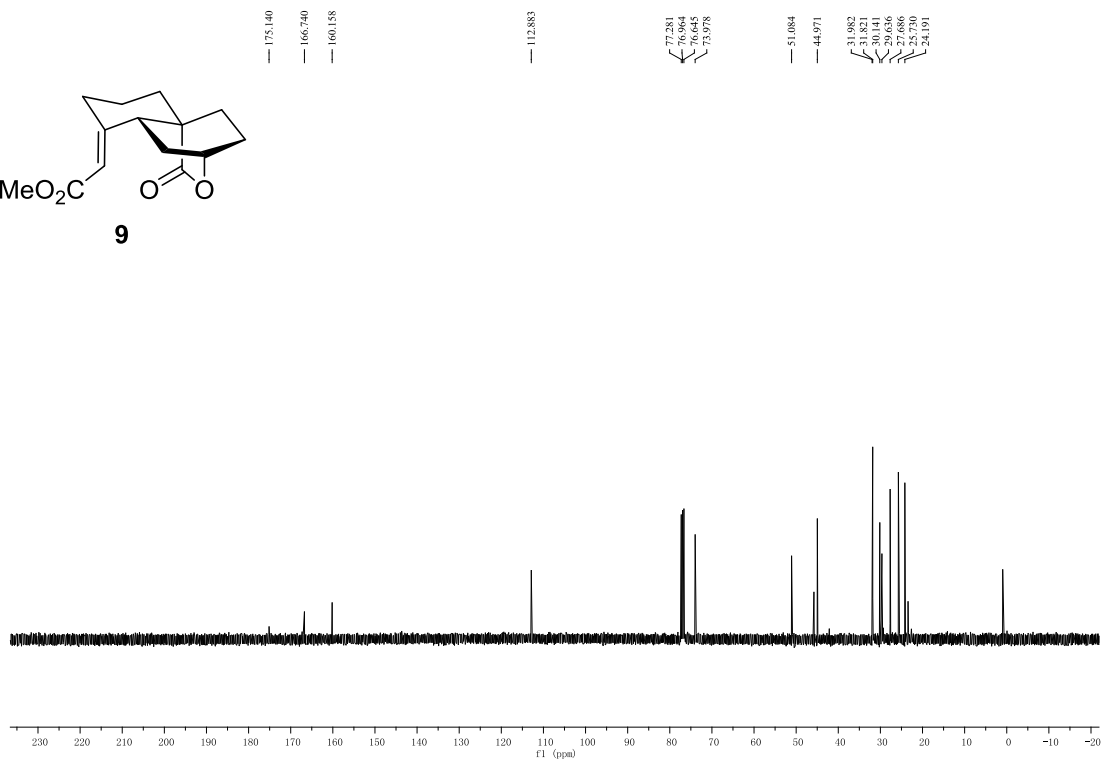

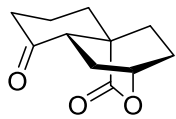

16

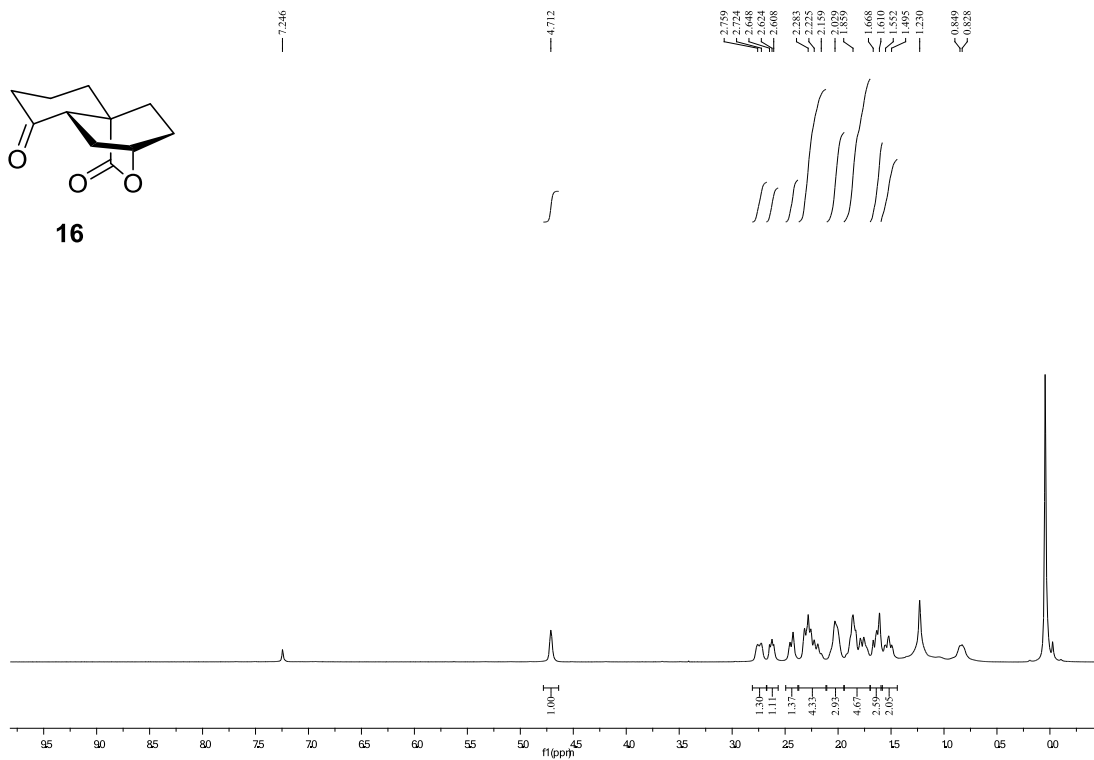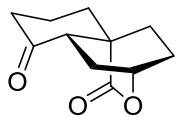

16

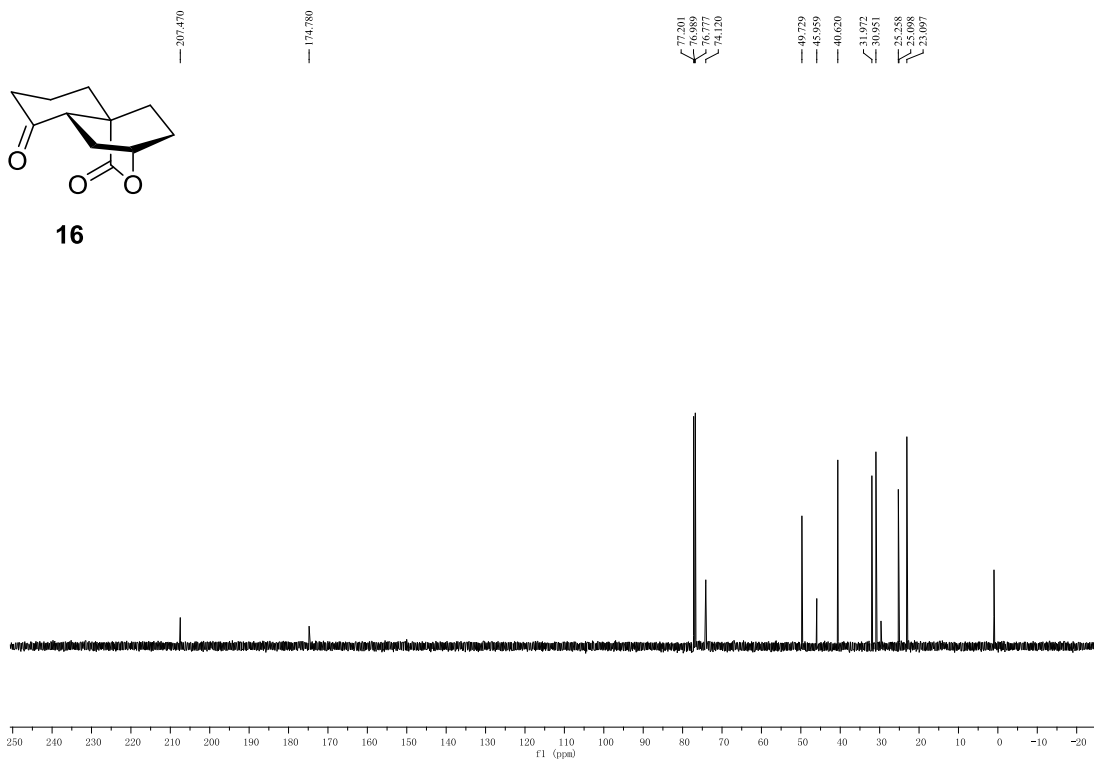

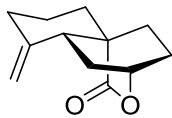

17

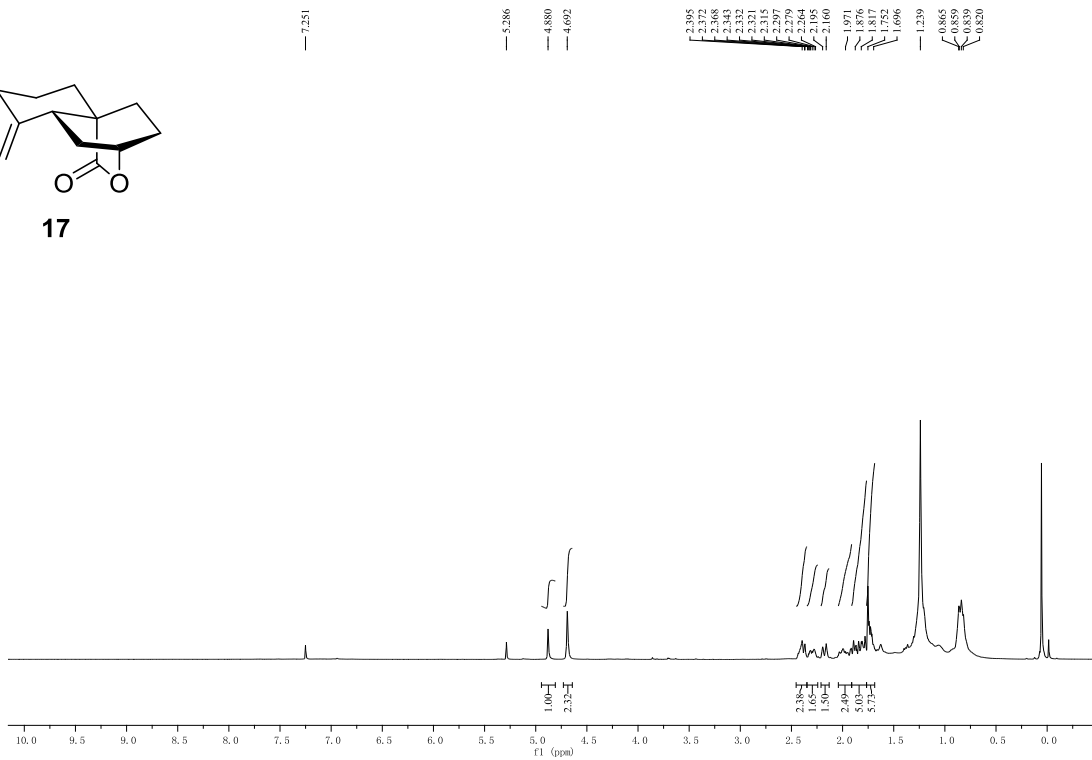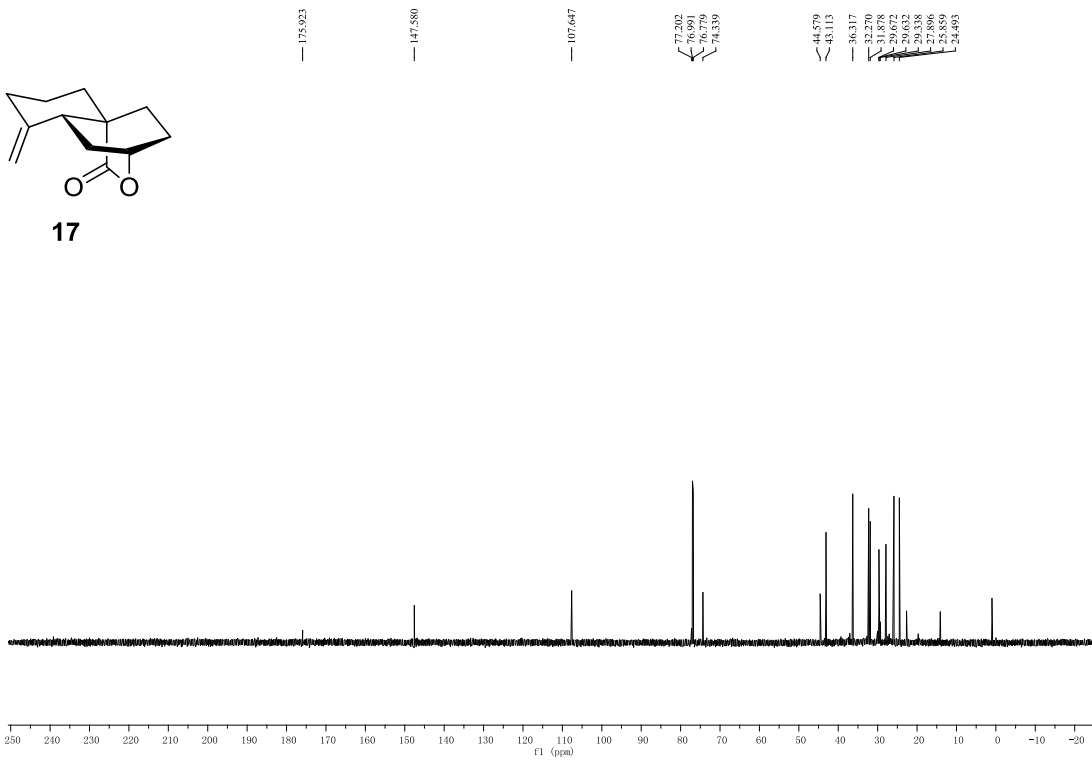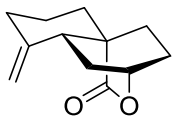

17

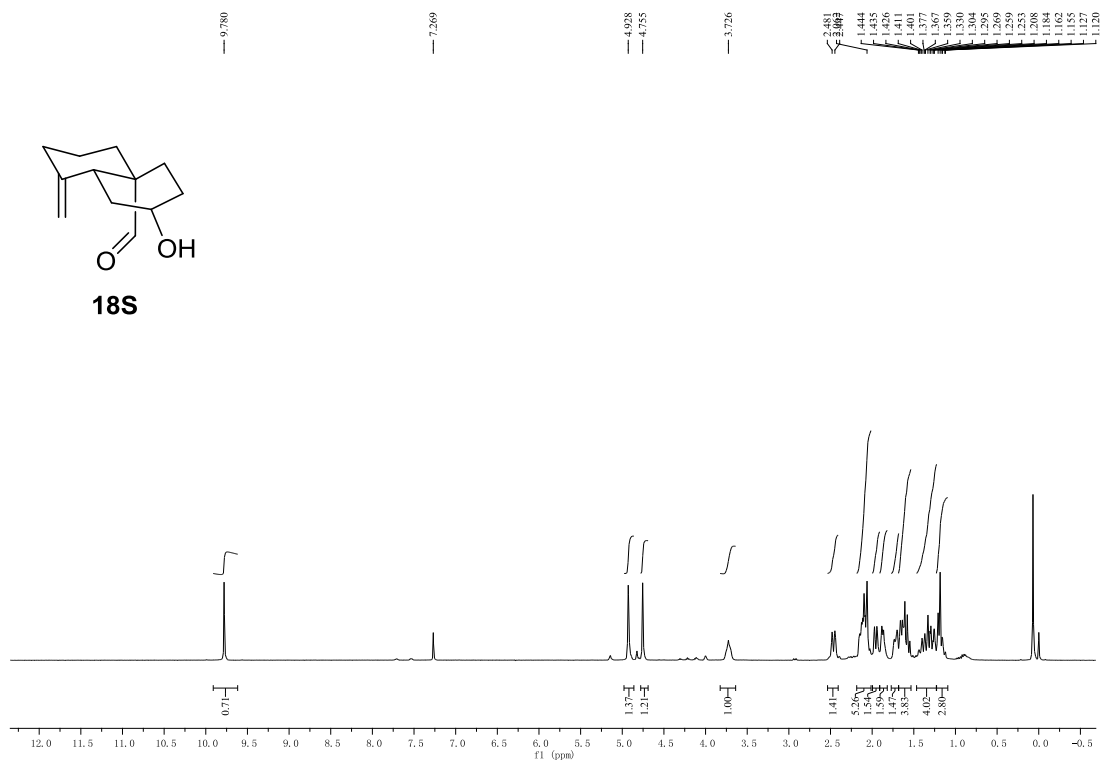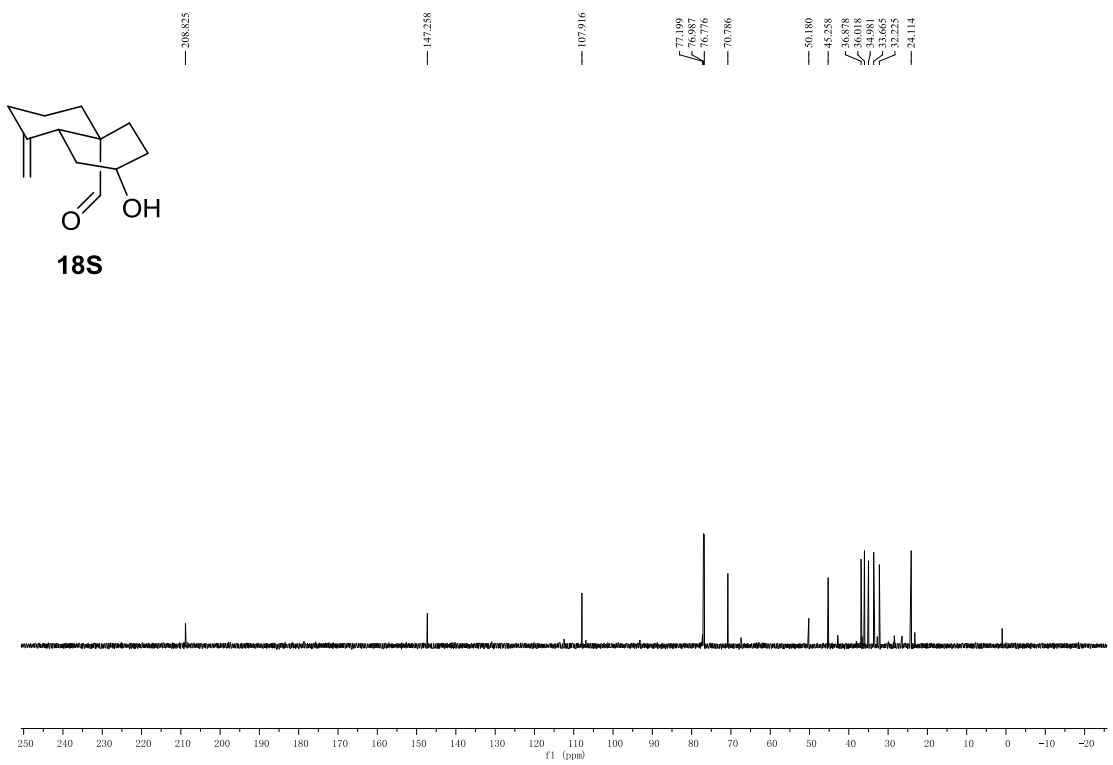



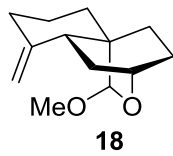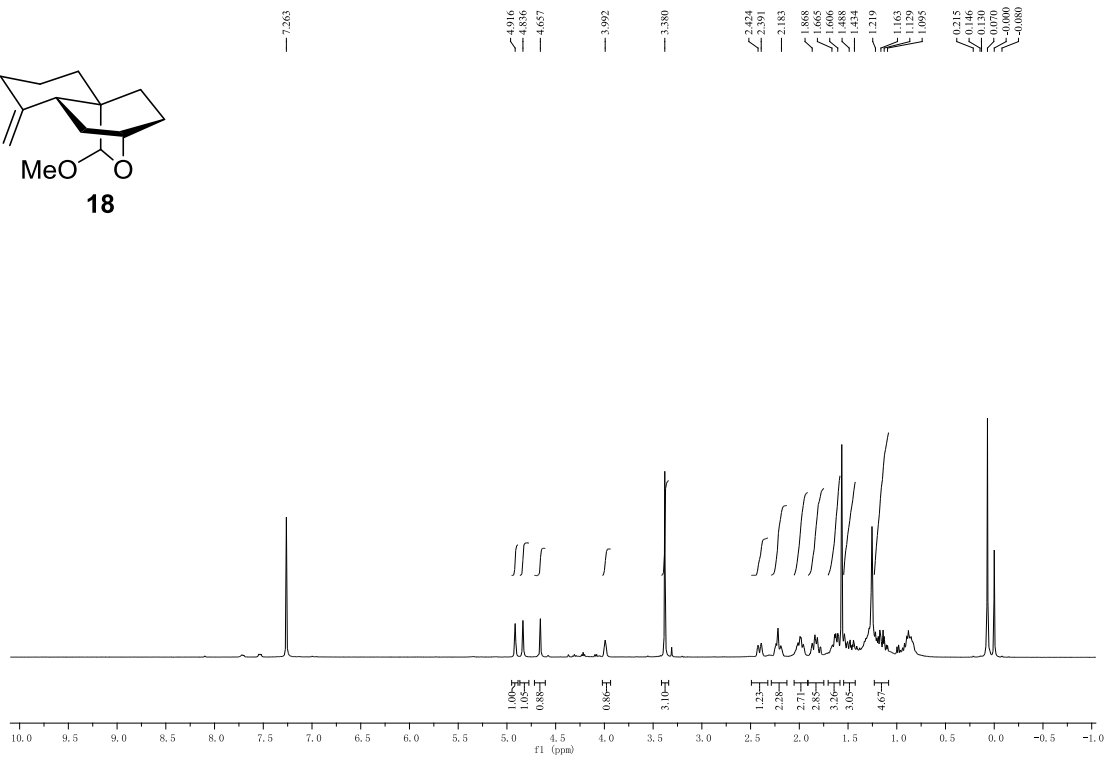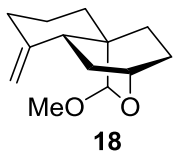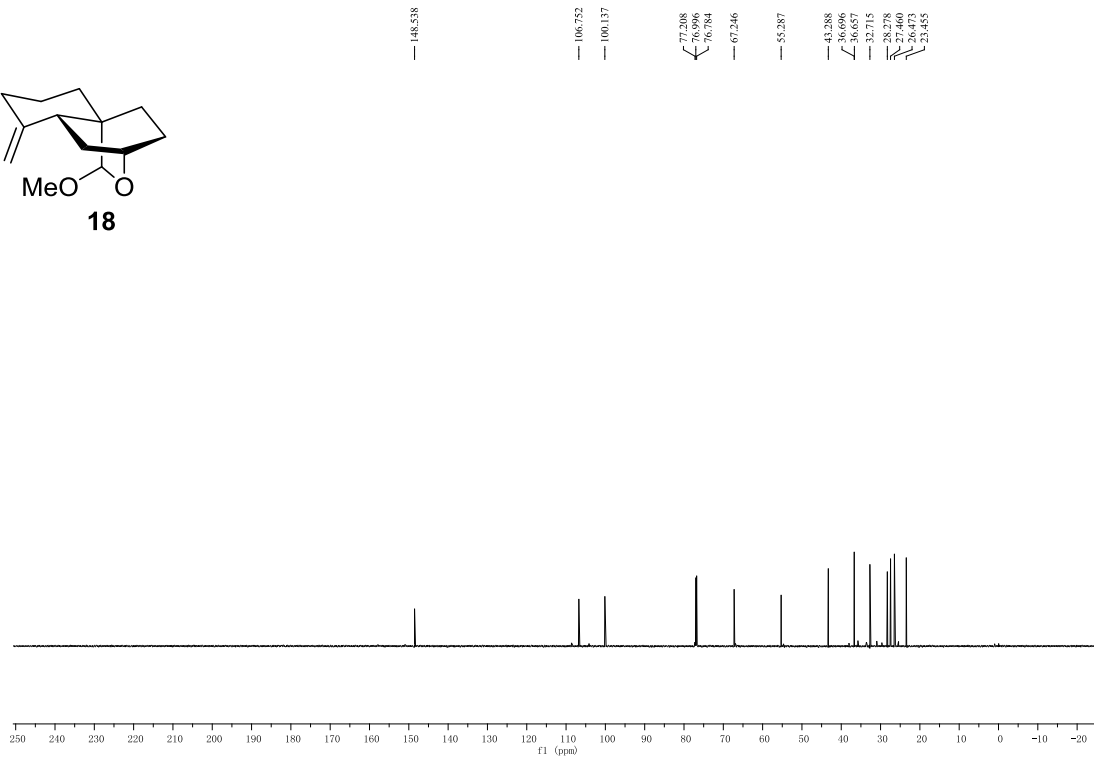

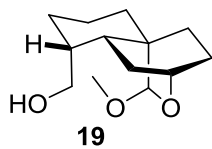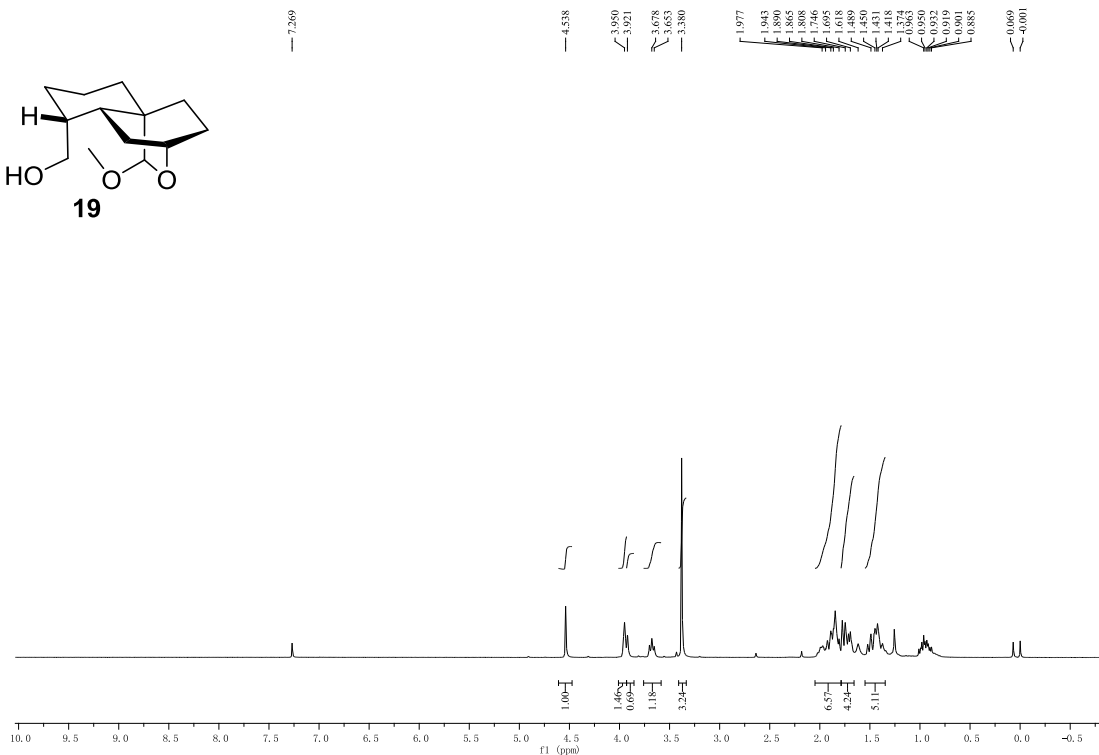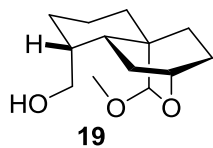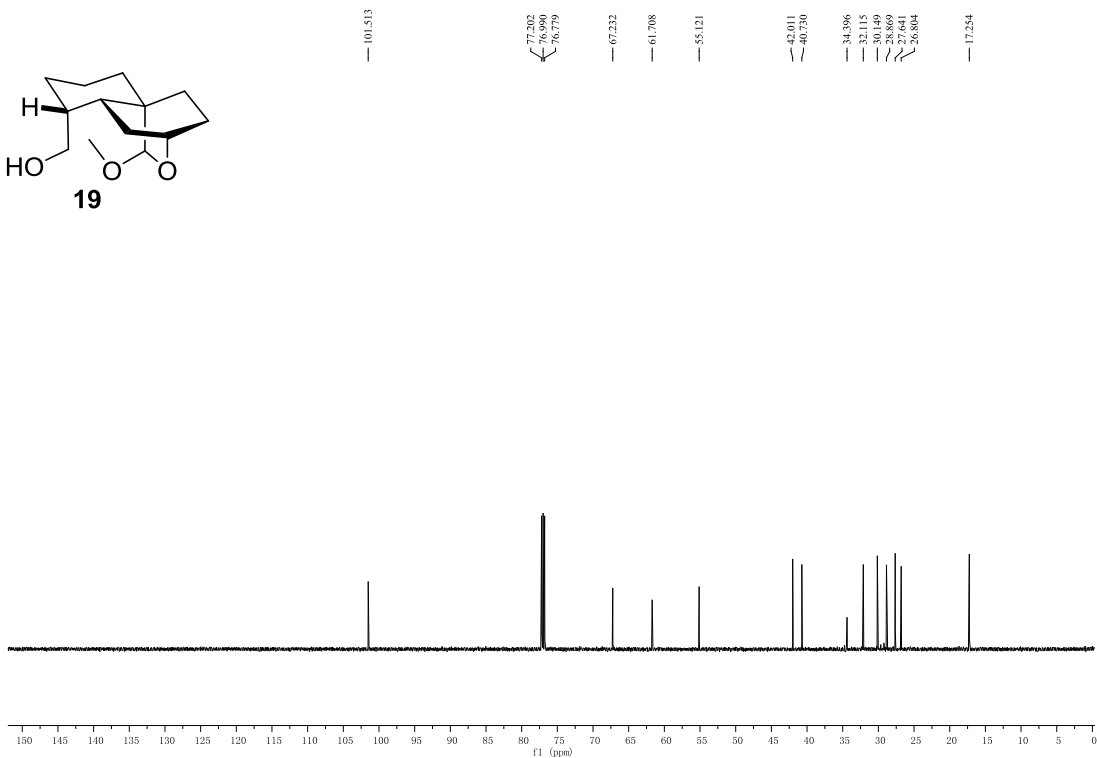

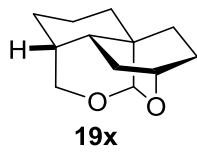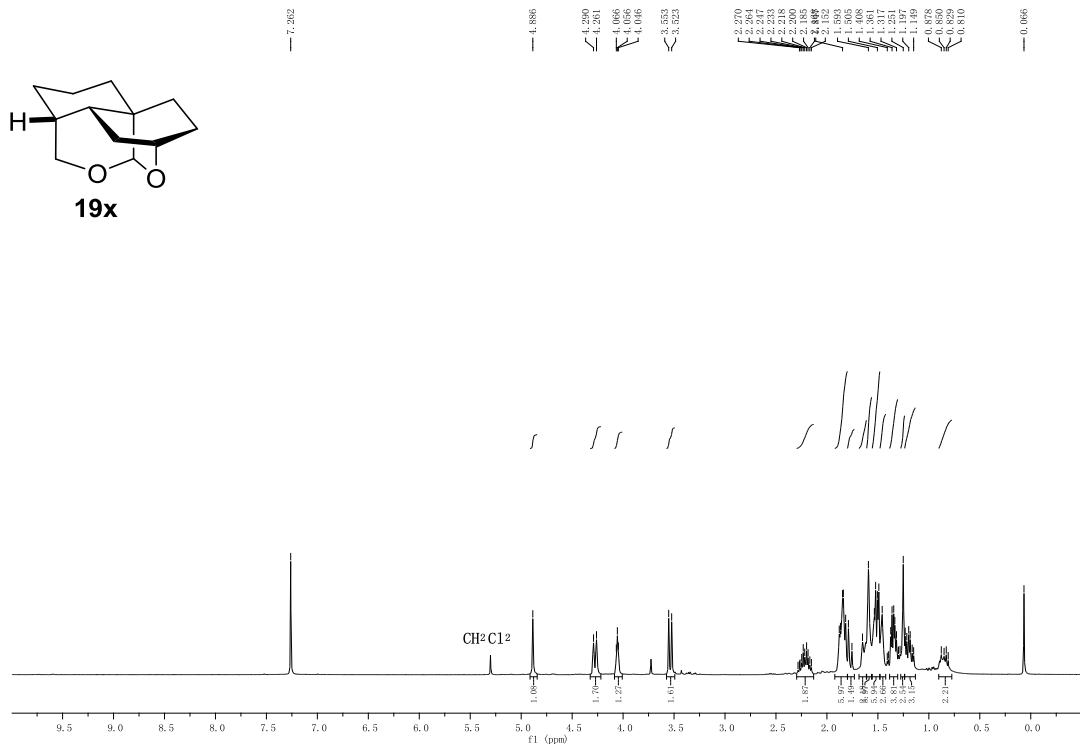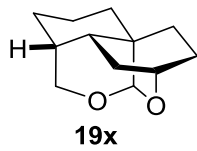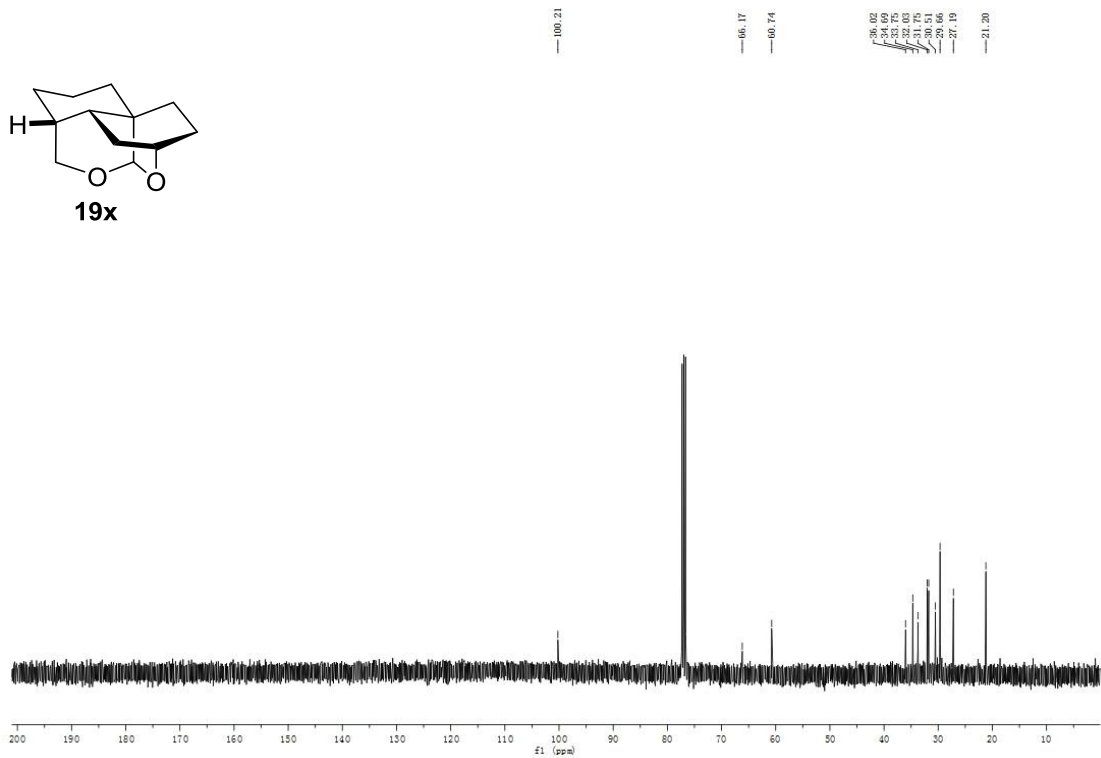

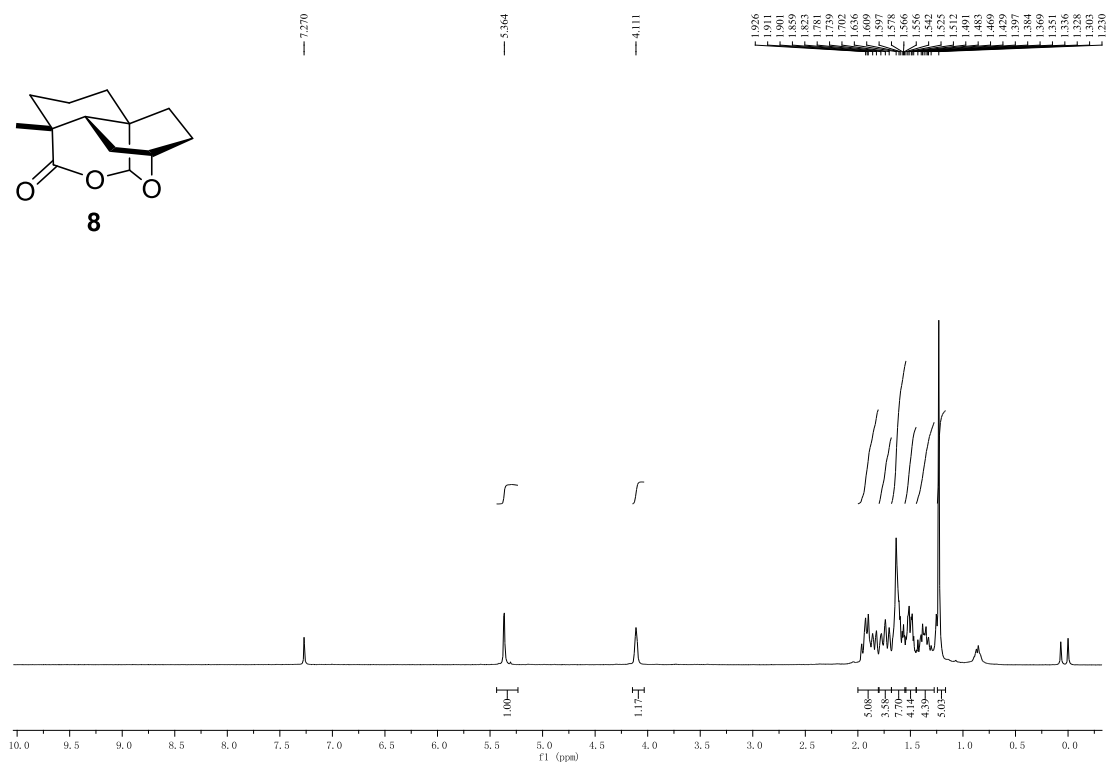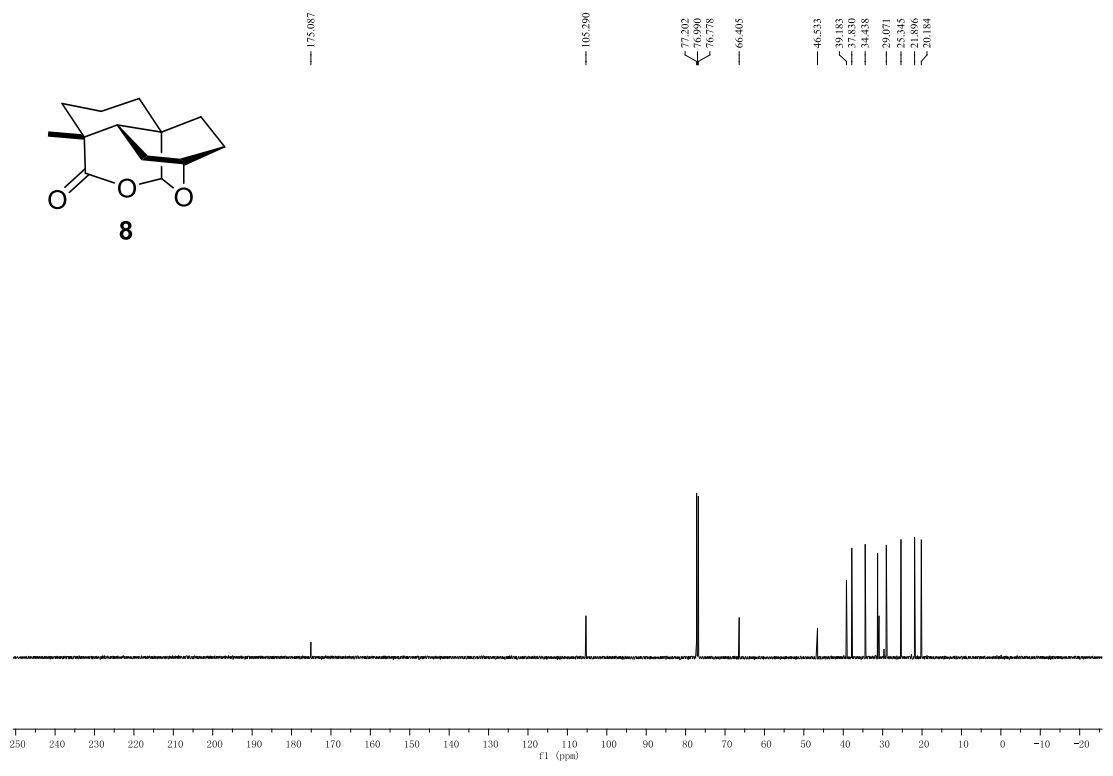

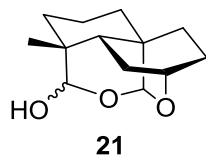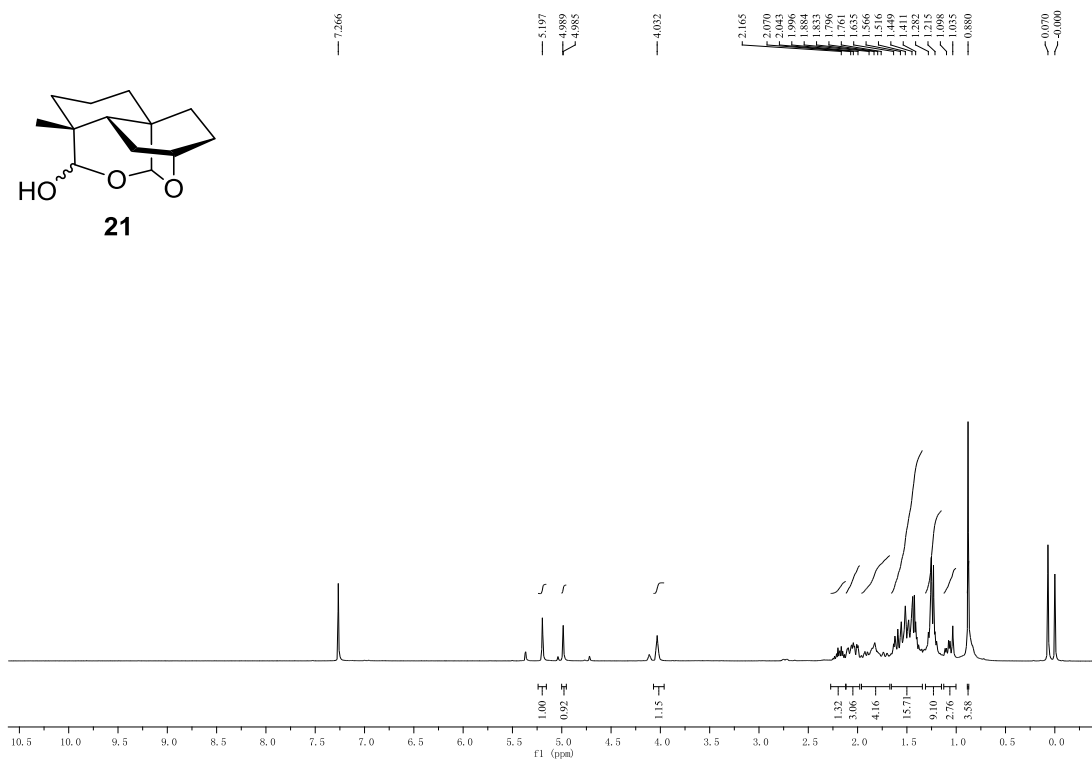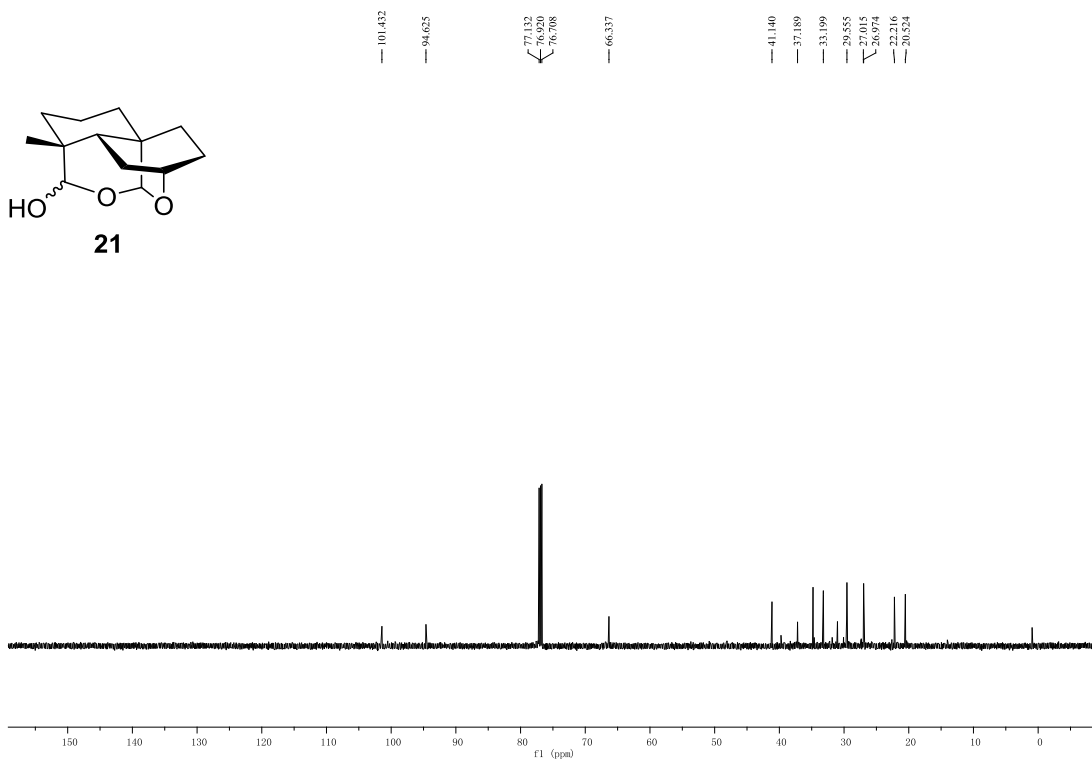

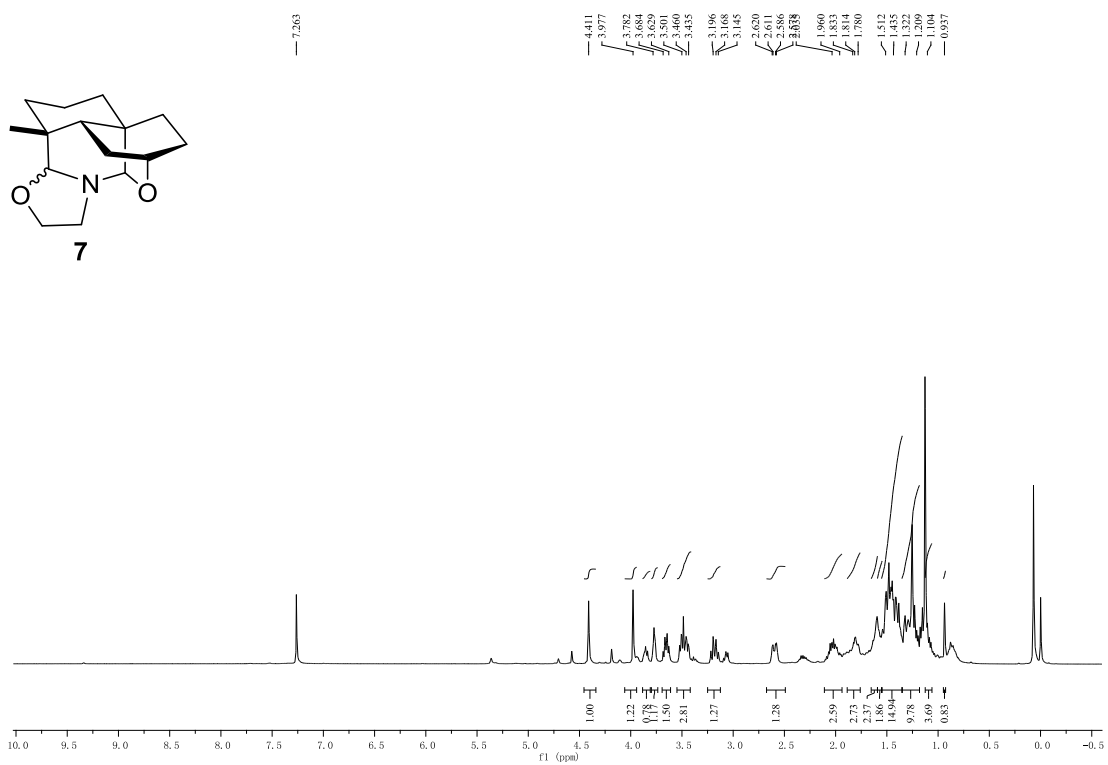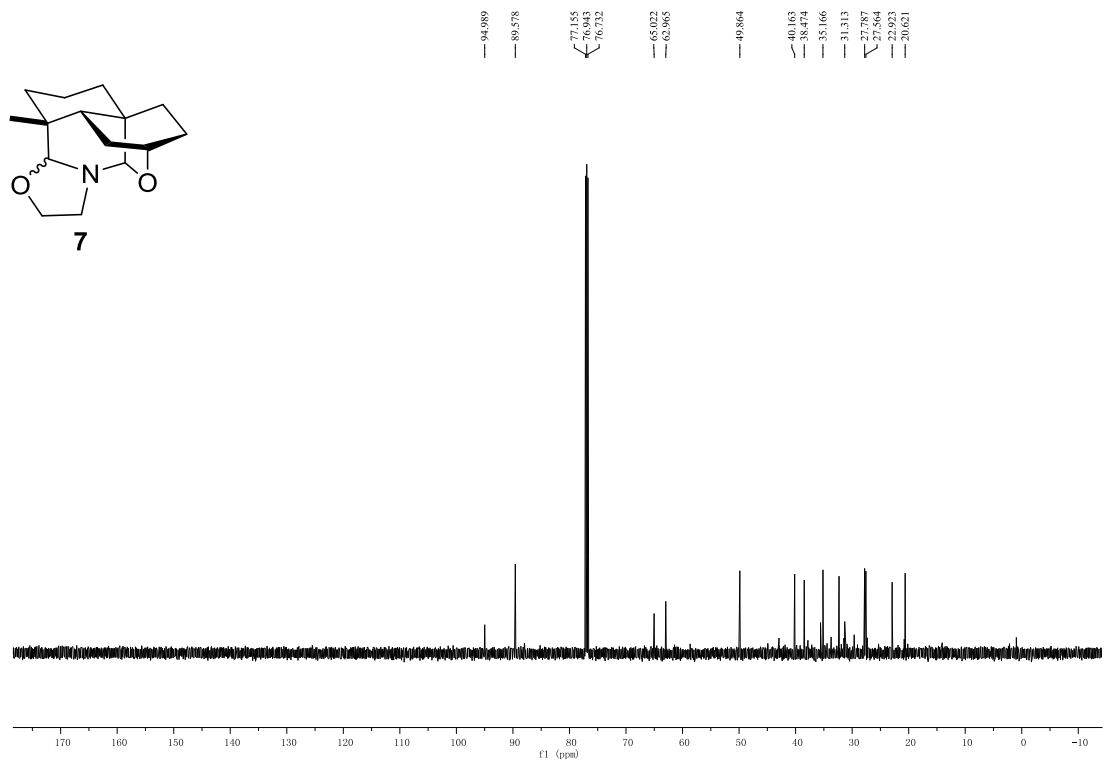

Supplement: c6ob00053c1.pdf [file c6ob00053c1.pdf]
